# Supplementary material for: Mitochondrial genetic diversity, selection and recombination in a canine transmissible cancer
Source: eLife journal article supplement (doi:10.7554/elife.14552), 2016-05-16
Supplement: fig3-data1 [file 14552_Figure_3-source_data_1.pdf › 14552_Figure_3-source_data_1.pdf]

Figure 3 - source data 1

A

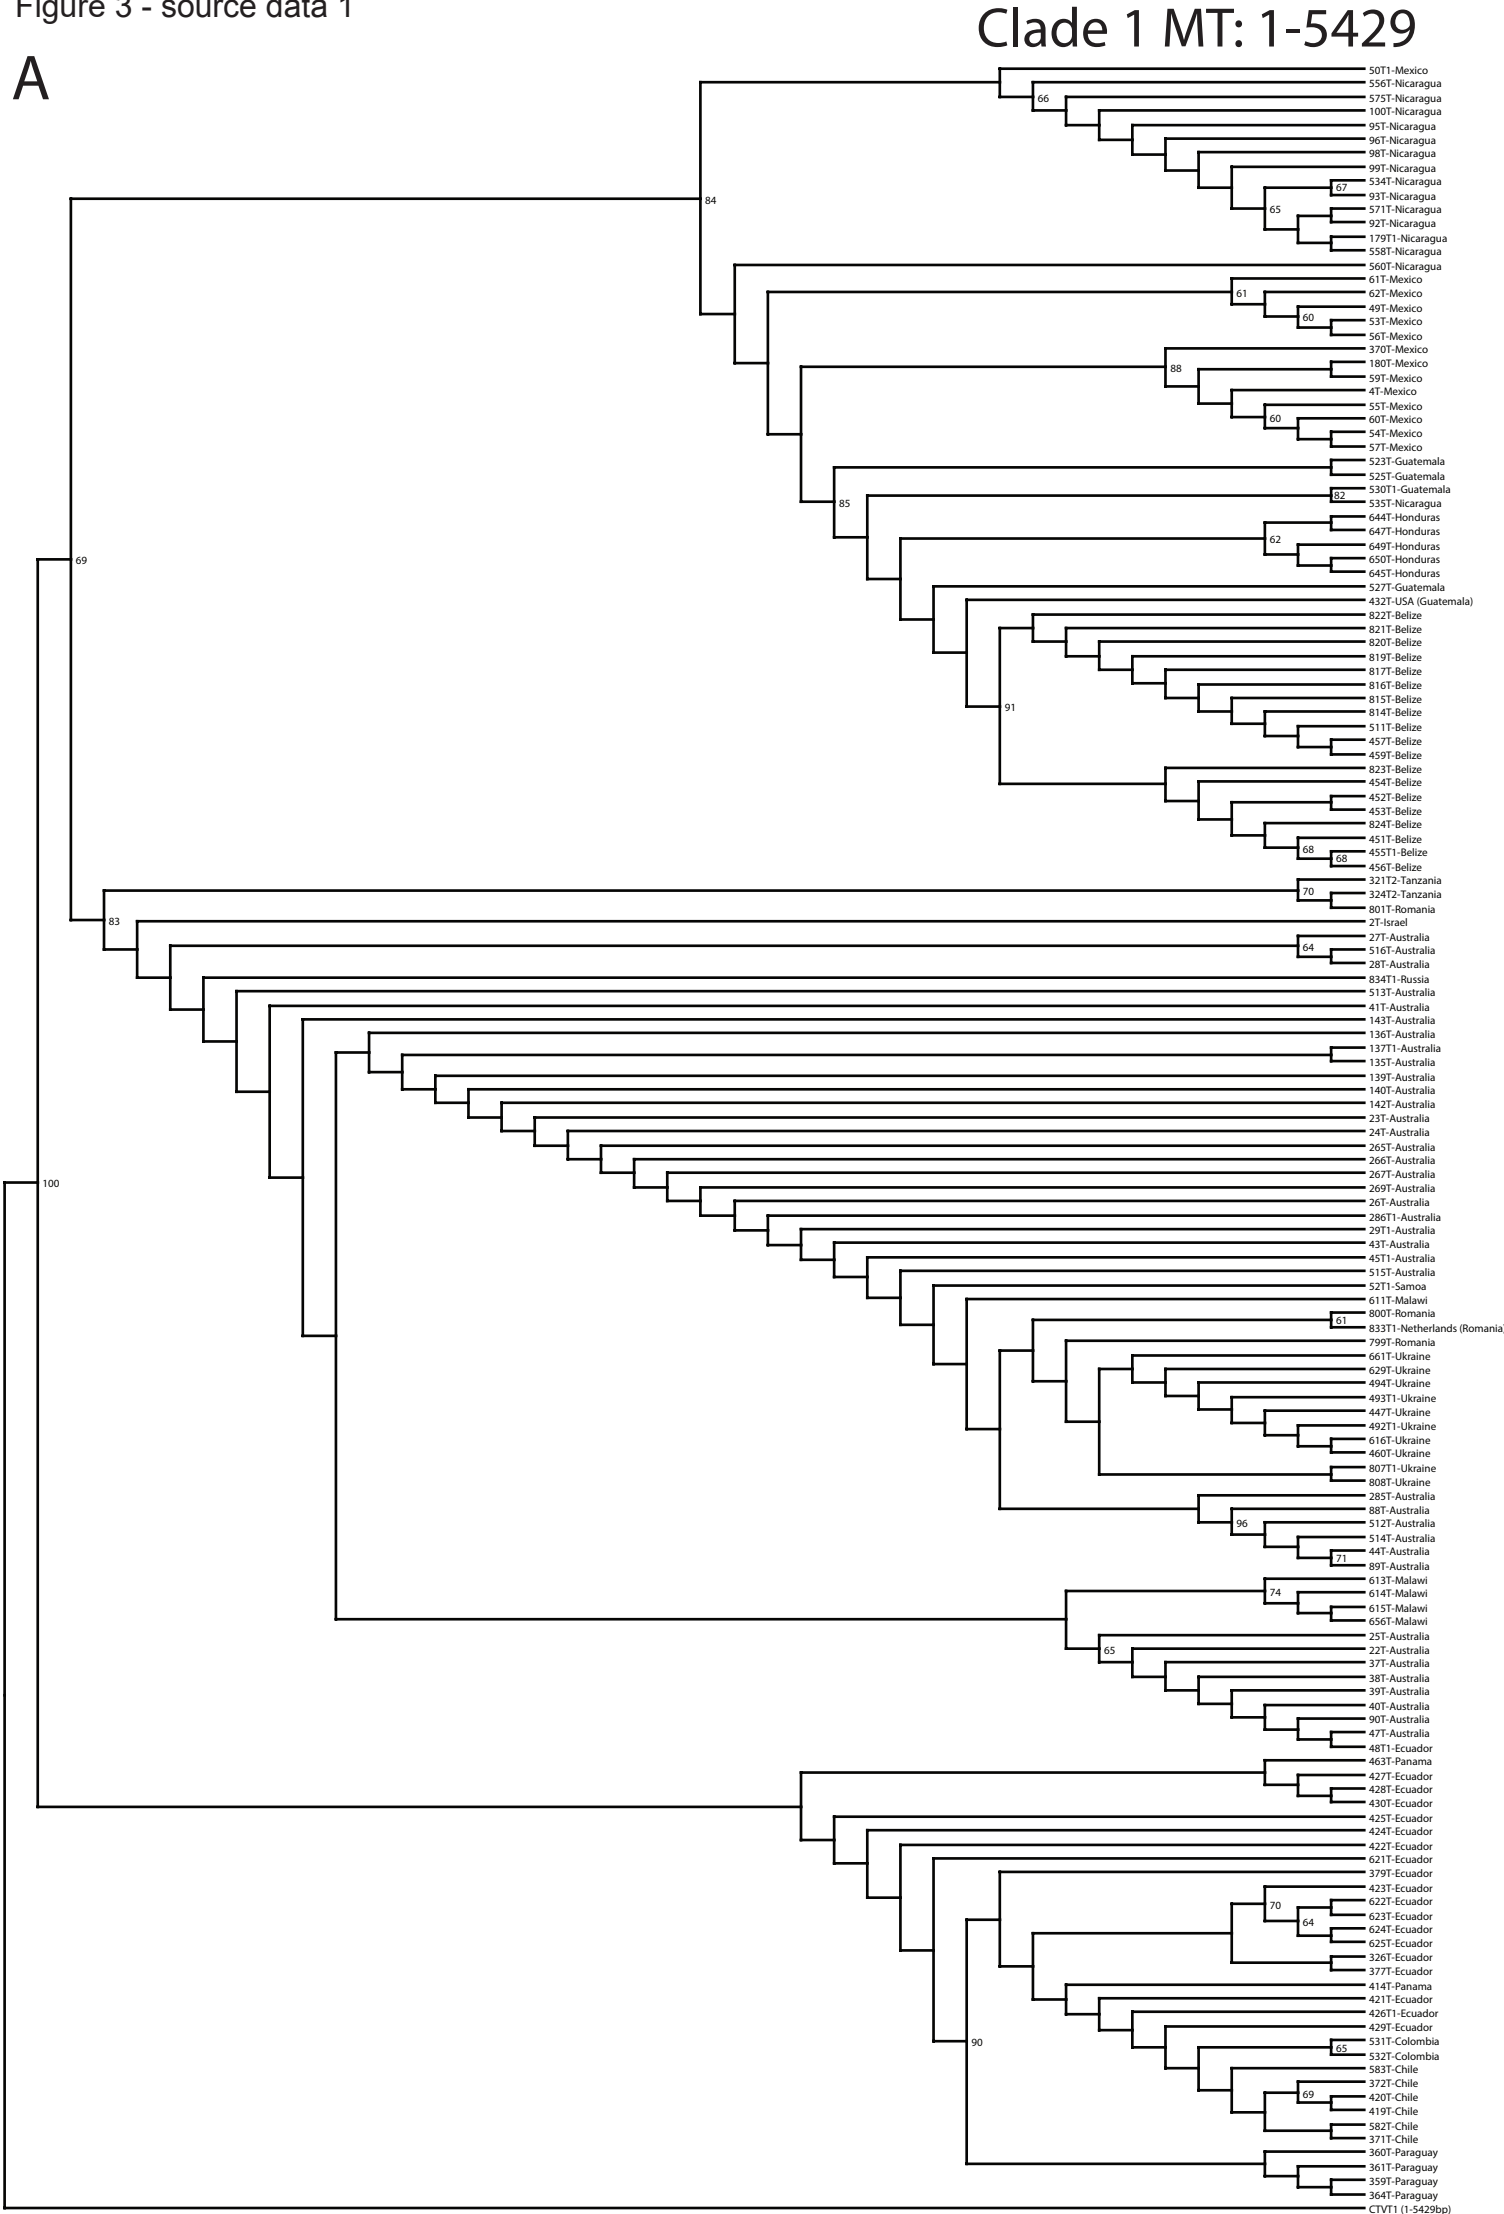

B

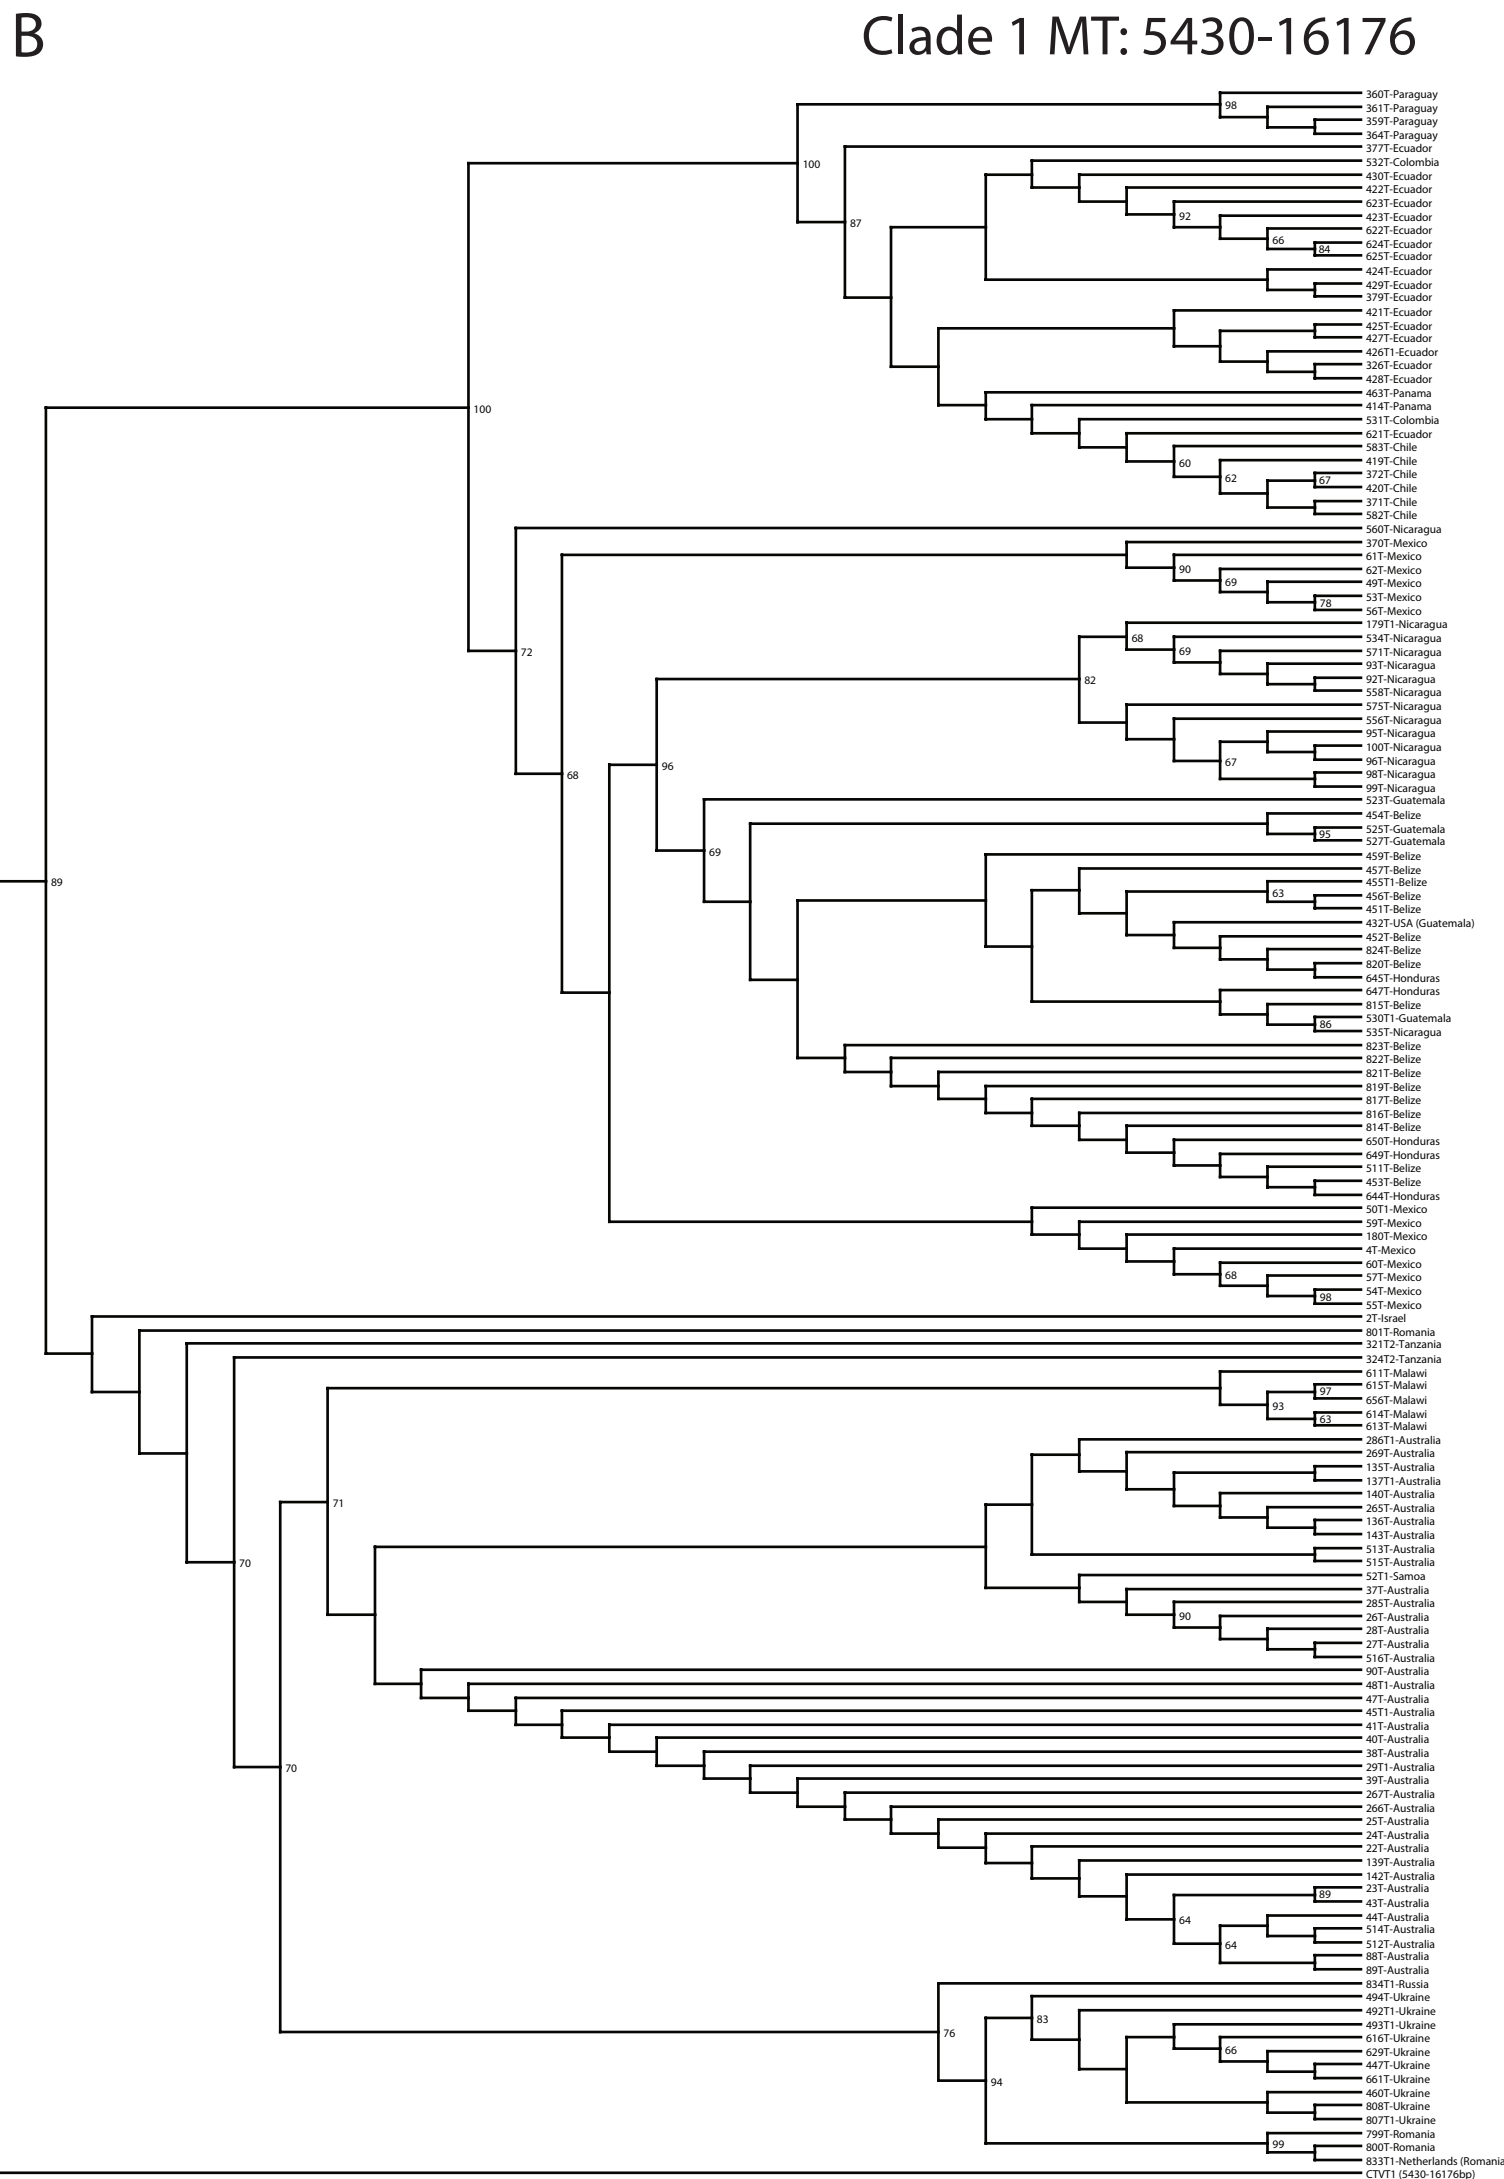

**Figure 3 - source data 1. Ancient mtDNA recombination in CTVT clade 1.** Maximum likelihood cladograms constructed using clade 1 mtDNA positions **(A)** 1-5429bp and **(B)** 5430-16176bp (see Methods). Trees were constructed with 153 clade 1 CTVT mtDNAs rooted with the CTVT1 haplotype, which contains clade 1 clade-defining germline and potential somatic substitutions (Methods, Figure 1-figure supplement 6). Bootstrap values were calculated from 100 bootstrap replicates and are shown where bootstrap values  $\geq$  60.
